# Supplementary material
Source: Springer Nature journal article supplement (https://www.springermedizin.de/resource/supplementary/13058_2009_2536_MOESM7_ESM.pdf/9701642)

0

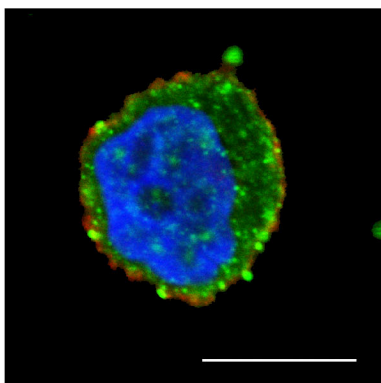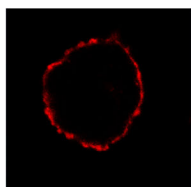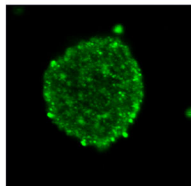

+ D609

1h

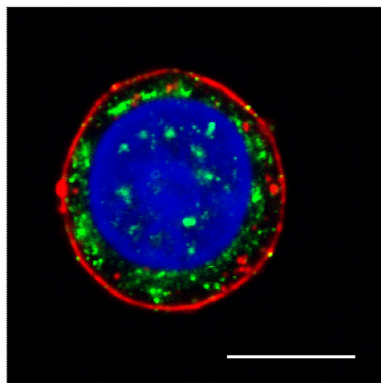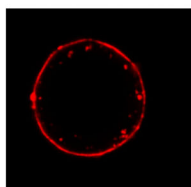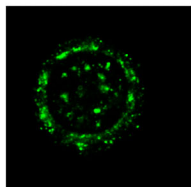

3h

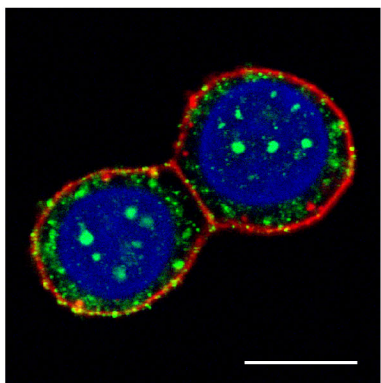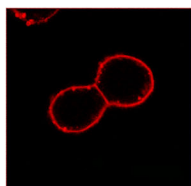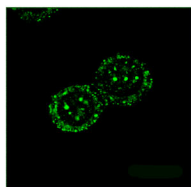

6h

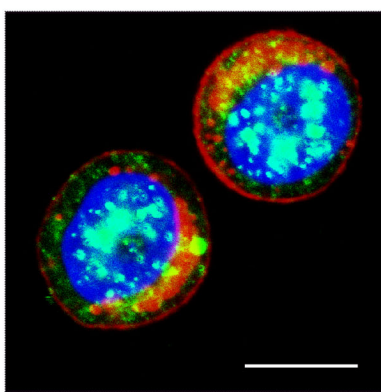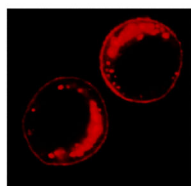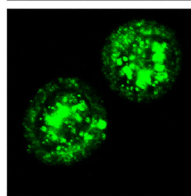

24h

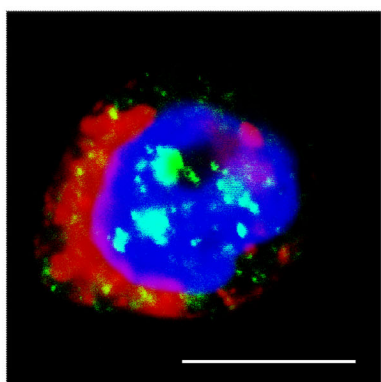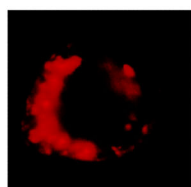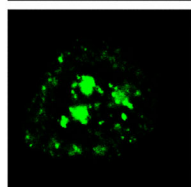

Supplement: MOESM7 [file 9701642]
